# Supplementary material for: Post hoc support vector machine learning for impedimetric biosensors based on weak protein–ligand interactions
Source: Royal Society of Chemistry journal article supplement (doi:10.1039/c8an00065d), 2018-01-01
Supplement: c8an00065d1.csv [file c8an00065d1.csv]

name	Label	1	2	3	4	5	6	7	8	9	10	11	12	13	14	15	16	17	18	19	20	21	22	23	24	25	26	27	28	29	30	31	32	33	34	35	36	37	38	39	40	41	42	43	44	45	46	47	48
4B2G1	0	258.054229	255.299691	278.492955	275.258838	289.347566	287.247927	286.058176	296.438676	301.039143	300.781714	307.305851	308.219676	312.550444	311.666707	315.616756	318.54106	322.457927	326.558636	330.949427	336.52842	343.795531	352.501566	359.595675	372.104547	385.386363	400.215034	417.191463	435.551443	456.392686	479.043834	502.863856	525.278621	546.064559	569.402528	590.814032	610.02003	631.463268	645.703143	662.827381	676.304425	692.487642	701.059479	714.69592	726.892119	736.273264	750.017128	754.658096	768.863902
4B2G2	0	265.889417	268.070214	273.756991	285.190244	278.425655	290.343261	291.549875	293.650884	302.007319	302.937744	307.623085	308.726228	312.36686	313.926497	315.542666	319.353956	321.578311	325.715492	332.926516	337.591797	344.365325	352.140558	361.368753	373.234557	385.98353	400.15117	416.53993	434.585374	454.231103	473.465402	495.040706	515.002786	533.104038	553.42518	571.197223	587.570113	605.252644	617.180056	632.894524	643.44767	658.467069	665.649416	678.500589	688.513518	698.494425	709.91789	715.749179	729.397225
4B2G3	0	267.31704	266.457742	276.33331	275.422582	286.875938	282.889769	294.983758	298.717685	299.294251	304.118634	306.914752	307.746617	312.053826	312.98162	315.565961	318.392438	320.380581	325.886717	331.639717	336.91675	344.825276	351.980827	362.666908	373.001221	386.11149	400.497732	416.445513	434.784045	453.740212	474.013043	495.816619	515.021729	533.783735	553.132581	571.884771	588.090157	605.66845	617.216237	633.634046	644.347827	659.363746	667.202668	678.809506	690.434302	698.990438	711.771366	717.065798	732.98238
5B2G1	0	212.903101	210.175292	226.393328	227.735508	227.905214	226.830447	234.864804	238.059197	239.78233	242.30753	242.449995	245.144069	246.902546	247.161169	249.617437	253.101253	255.812116	259.074314	263.4009	268.756561	273.469491	279.641616	287.528744	297.754169	309.439468	322.954217	340.3438	360.622306	384.195765	410.69393	441.665504	475.710257	509.572124	546.832893	585.425779	622.797572	661.770268	694.808409	731.647309	760.357453	791.970562	812.882381	839.078613	860.047419	878.641809	900.843971	911.073514	934.175939
5B2G2	0	221.899819	225.236656	231.569179	227.623338	227.167721	228.394387	234.24144	240.874936	242.433512	243.288008	244.254403	247.55388	247.395538	248.674973	250.999052	253.904835	255.886406	259.296735	264.077086	268.157361	274.035073	280.118267	287.625684	297.383089	308.325725	323.066269	338.721075	359.078762	382.109433	408.682372	441.251015	473.535945	507.712976	544.560383	583.898404	622.006361	660.6147	692.731743	727.519995	754.69166	785.807863	805.9953	830.222855	849.403206	866.617888	885.509807	895.559648	917.156297
5B2G3	0	220.502312	213.891535	224.601281	228.974124	225.447715	231.434041	239.456173	239.441063	240.501747	244.019913	246.127711	246.616145	248.326054	249.404064	251.059362	253.899151	255.79022	259.230123	263.293557	268.806099	274.380399	279.387077	287.639415	297.878926	309.079152	322.654877	339.295185	359.994808	382.431923	409.201433	440.203114	472.530536	505.394427	542.712001	579.063564	615.474426	652.891006	683.705926	716.812899	744.044036	772.335897	792.107639	815.788765	834.255893	849.822626	870.454234	879.95055	900.549128
6B2G1	0	166.994919	173.720397	184.319214	169.568196	173.209868	176.531726	179.866211	179.617042	183.928413	185.82301	186.448726	188.365823	190.58088	191.496255	193.658663	196.213892	197.829232	202.141756	206.623249	210.485239	217.460715	223.753763	231.397767	242.066617	253.484118	267.063133	283.238176	301.399056	323.487312	345.829639	372.124112	399.069947	425.80291	454.22823	481.443927	506.881386	534.494371	555.882992	578.496945	596.805927	617.54516	630.487241	648.152	663.510642	675.591631	691.635857	698.350256	714.895786
6B2G2	0	179.069446	182.063192	171.948503	169.270854	183.16196	179.863683	183.720984	182.069063	184.874057	185.676217	187.904252	189.692298	191.194394	191.799864	192.723717	196.458962	198.458465	202.60658	206.752555	211.201473	217.900967	224.307767	232.99577	242.731195	254.353219	268.179846	283.81767	302.889665	323.932194	346.254893	371.539954	396.817335	421.16277	447.467606	472.901601	496.235585	520.075448	539.865268	561.629815	576.977936	596.578468	608.140129	623.237568	637.866349	648.926491	663.543759	670.643332	686.441201
6B2G3	0	168.634859	182.526111	178.645987	174.20165	177.740081	179.415386	182.875435	184.372091	187.362054	184.120978	186.311151	189.672126	191.234191	191.567943	193.564612	196.921633	198.749501	202.779498	207.487732	211.930588	218.078747	224.896871	233.177985	243.394304	255.36857	269.687907	285.396412	303.294722	323.571415	346.671982	371.778063	396.369689	419.601798	445.856315	469.393177	492.534097	515.82055	534.319189	554.16271	569.975213	588.202186	599.530878	614.706124	627.794641	638.257366	651.729218	660.016859	676.541518
4B2G5A1	1	259.931286	259.018808	266.88761	284.159187	285.043945	286.612288	294.971474	297.341141	304.183294	302.675339	305.645915	309.180849	311.161716	310.845077	313.014181	317.062574	319.439926	323.519876	326.576497	330.635252	337.344416	343.801657	351.036478	361.589165	372.626794	386.555365	403.708051	424.055949	447.053003	473.6555	504.473671	535.170321	568.096519	605.089862	639.03719	673.790653	709.47586	737.551903	769.980375	793.68488	821.508042	838.17883	860.018103	877.777015	893.227315	911.659038	918.537981	938.229753
4B2G5A2	1	263.465985	266.430475	283.556622	278.29801	285.139292	285.085764	289.287958	298.208654	300.964544	302.78916	303.546035	306.722571	309.81232	310.640192	311.640238	316.109664	319.303284	322.85554	327.518237	331.692772	338.811244	344.290293	353.592984	363.407832	375.40071	390.753963	407.190159	427.207276	449.309728	473.481635	501.742827	529.861183	559.551368	589.767688	619.038434	646.772478	675.919588	697.978561	723.832367	742.978337	765.427459	779.239974	797.236181	811.38947	825.284793	841.285915	848.116838	865.933991
4B2G5A3	1	265.750245	266.41747	272.312285	276.05522	276.781389	288.010297	291.824103	293.725714	299.561052	301.329142	303.310613	303.807501	308.462322	310.183718	312.885912	316.545369	318.250694	322.499709	327.070097	332.517347	338.325982	344.788856	353.370394	364.102606	377.350492	390.382705	407.402214	427.823029	449.482554	474.14752	502.206393	528.602381	557.117339	587.042902	615.077976	641.318862	669.481841	691.717876	715.985041	734.433259	755.949922	769.797576	787.065262	801.382629	813.61353	829.904611	836.93283	855.320279
5B2G5A1	1	214.016295	227.533925	223.988088	230.301514	225.777366	232.949359	236.923873	240.970321	242.993578	241.422298	245.631838	249.817333	249.93032	249.739527	251.79256	253.950193	256.129655	260.004161	262.149143	266.209285	271.705362	275.763367	282.888768	292.174878	300.314253	312.514621	327.170057	345.000501	366.021205	392.82157	424.756707	461.195005	500.974311	547.886335	598.527089	652.57663	712.298353	765.383997	822.488654	872.737118	925.795987	966.560744	1008.123965	1044.375473	1074.270686	1106.916851	1123.130098	1152.114205
5B2G5A2	1	221.686334	218.246081	224.294353	225.426915	234.808432	235.188071	237.137854	239.158824	242.654316	243.45876	245.48002	247.039485	249.686277	250.027755	251.782096	254.624662	256.260326	259.467371	263.148328	265.603608	272.199585	276.189343	283.93138	291.796941	302.208935	313.791582	328.311831	347.11921	370.041438	396.80903	428.887715	464.199379	503.502804	549.49836	597.315561	648.520411	703.735396	753.038324	804.520798	850.835078	898.445719	935.359898	971.863633	1004.395926	1030.456655	1059.012831	1076.804813	1106.577876
5B2G5A3	1	219.979999	212.665514	217.834835	232.997941	229.080917	234.606961	239.065503	242.795228	240.446929	246.935685	247.838802	248.338051	250.053077	249.12002	250.734871	254.354056	256.05205	260.274272	263.5452	267.244421	272.218648	277.191594	284.581427	292.568364	303.004094	314.695517	330.162691	348.928171	371.271015	398.095228	429.516878	466.066347	504.312198	549.498969	596.803561	646.69607	698.514045	746.330712	797.07741	841.233333	887.704775	920.657178	956.102897	987.219124	1013.085355	1041.095059	1055.801517	1084.132006
6B2G5A1	1	186.332984	178.2627	177.425784	185.123151	182.148146	184.889208	182.50087	183.927004	188.006996	190.482418	191.265288	190.028223	193.11227	193.467823	194.869922	196.837533	199.026152	200.76303	204.783367	208.044028	212.569581	215.856201	222.481924	228.683078	236.504614	247.247882	259.809675	275.398909	294.230368	316.857556	346.843834	379.756068	417.049603	463.320459	513.700398	570.137554	632.983558	693.398466	760.805906	823.032693	887.760003	937.298801	992.159974	1037.375627	1075.369829	1115.293134	1138.692096	1173.240832
6B2G5A2	1	179.891416	173.659492	173.566082	180.165747	180.253381	182.617601	184.529274	184.747118	186.41011	187.689488	187.263136	189.866244	190.992218	191.255633	192.91922	194.941284	196.886476	200.749744	203.414017	206.335608	211.560906	216.644732	222.776389	230.742979	239.431173	250.589472	264.383776	280.883301	300.824044	324.84064	354.911692	388.214951	425.062793	466.757811	514.065529	564.127385	617.96894	668.311769	723.503412	771.200681	823.309049	860.351378	902.532412	939.541742	969.795476	1000.89285	1021.166384	1050.284836
6B2G5A3	1	182.329193	179.92401	177.241201	167.864711	180.462395	179.46506	185.458735	183.639915	188.315362	186.655304	189.57184	189.863613	191.808966	191.505908	193.188799	195.572435	197.643091	200.663359	203.615644	207.115658	212.127784	217.353748	224.334357	231.204976	239.899163	251.787279	265.153059	283.099856	302.570442	326.534715	356.281373	389.177678	425.872991	467.622759	512.849	561.24525	613.687078	661.384341	712.877824	757.491959	805.563508	840.754964	880.283807	913.127568	941.819627	971.563771	989.594328	1018.367829
4B1G5A1	1	286.9791	291.591392	297.687087	292.362985	306.44673	314.455915	308.45491	322.798641	324.860391	325.378841	325.218664	333.271636	331.934239	333.552256	336.64415	337.860028	341.803763	344.355604	348.00826	349.86914	356.201085	360.070639	366.004713	371.171855	378.866041	388.568029	400.468379	414.535004	432.100717	453.25639	479.748374	512.561762	551.40983	597.459692	652.964637	718.733352	793.426395	877.083514	964.935185	1060.985271	1161.825334	1262.395743	1361.075597	1454.125203	1544.852041	1619.60404	1696.573587	1752.262757
4B1G5A2	1	272.967159	281.887813	288.857905	313.41637	310.841113	312.876483	312.69069	309.68919	323.105885	325.544776	327.300063	327.980986	332.406033	333.071618	333.172336	337.33663	339.349971	343.078594	346.422777	350.037977	354.065876	358.763178	364.384338	371.143074	379.361024	388.748086	401.997627	416.915181	434.412325	457.383019	484.636381	519.903732	556.795247	605.025019	657.815021	720.690529	790.16564	863.816053	941.248227	1023.214734	1102.495147	1182.219099	1257.434445	1329.409521	1395.736796	1451.512682	1512.324163	1557.508159
4B1G5A3	1	295.27616	283.159925	300.021267	297.092948	299.560556	307.445933	310.403873	321.030455	319.003469	325.23395	326.028467	330.977711	332.898009	331.677115	334.373655	338.377203	339.067445	343.487983	345.573407	349.996565	354.613117	358.474005	363.553451	373.629065	379.749533	388.978366	401.789421	417.268014	435.083614	457.329171	485.655361	520.606124	558.491444	604.954034	660.300191	722.493724	789.764241	865.589177	941.918988	1023.974257	1103.491316	1182.576312	1257.238986	1327.446038	1395.773203	1447.941115	1507.71656	1550.083407
5B1G5A1	1	263.955231	263.507908	269.215096	268.235577	282.268325	288.697865	289.624279	294.279128	299.830579	300.170018	304.261212	308.39799	309.433199	308.451794	311.932033	313.006217	317.10381	319.791867	322.924347	324.933592	329.900921	334.598691	338.147172	345.40855	352.447937	361.072389	370.848858	383.546069	398.929348	417.314524	440.22186	470.708722	503.654543	544.22086	595.280625	657.652417	726.309921	808.12401	895.852177	996.593371	1103.313313	1219.251634	1333.074191	1447.451893	1554.005885	1653.380513	1753.272599	1833.020466
5B1G5A2	1	265.771956	262.837512	271.856364	277.939429	277.795018	287.203374	294.608693	293.713501	295.099285	301.733842	303.477644	306.851877	307.040085	307.982957	310.743049	312.812431	314.513478	317.480607	319.799473	323.725775	328.214328	331.797057	335.816062	342.705867	349.773644	357.861611	367.978325	381.323712	396.40641	414.551269	438.597098	468.503874	501.114751	543.431684	594.979829	655.875735	725.527903	805.404145	889.941298	988.471171	1085.289376	1190.329695	1292.623091	1394.875073	1491.262516	1575.430037	1661.726812	1728.294614
5B1G5A3	1	266.688689	266.101969	270.763741	257.300302	286.680235	285.385043	289.906311	294.508524	301.476574	301.339454	302.250525	305.094208	306.406261	306.64732	307.876262	311.239252	315.081068	317.13068	319.771683	323.589064	327.540133	331.731309	336.390161	342.224507	349.646813	357.785322	368.392163	381.390254	396.778066	415.889064	440.341458	470.993506	504.518002	547.514254	598.010878	660.627204	729.430955	806.319068	891.12745	985.224882	1079.172614	1175.919885	1273.590642	1365.628239	1453.582067	1527.739974	1607.148527	1665.591707
6B1G5A1	1	218.493981	206.918828	203.651003	205.242075	214.302715	219.288594	219.043315	223.948962	224.943565	226.536885	228.562161	231.608764	232.036924	232.789831	235.186067	237.150101	240.045529	242.775629	245.862459	249.457264	254.460632	258.045688	262.475424	269.019388	276.956526	286.19533	297.564013	310.037229	326.382946	345.420606	369.461348	400.121613	432.80219	473.841624	522.43903	584.494926	652.444954	726.779254	811.108191	905.654896	1000.241215	1101.022286	1200.254465	1300.648145	1395.749268	1474.815072	1560.10729	1625.884491
6B1G5A2	1	213.876867	206.302559	211.707409	213.952447	217.27792	214.152388	220.665251	222.111498	223.051885	225.455426	227.390679	229.146974	232.134526	231.494013	233.863836	235.83965	238.35244	241.143022	243.876181	247.769519	251.430672	256.5105	261.099219	267.485691	274.659318	284.168805	295.482985	307.747595	324.973319	344.012995	368.9103	399.688252	432.5275	474.24728	524.346	584.801617	651.689161	724.120519	803.13552	893.099377	980.85475	1073.289142	1163.546246	1252.338839	1336.18985	1405.613378	1480.516254	1540.20299
6B1G5A3	1	212.505616	209.365822	220.558083	213.543931	212.80848	219.042514	221.856666	220.941884	223.925195	225.761089	227.134459	230.674159	230.704605	230.612785	234.431278	235.683979	238.077905	239.017651	244.449525	247.146246	251.879925	255.804311	261.041922	267.158857	275.337366	284.329558	295.06549	307.960743	324.206506	344.646592	368.750342	398.44285	433.54173	475.194275	524.525542	584.540103	651.13921	722.893923	803.101954	890.896075	976.412363	1066.734983	1154.792677	1239.155618	1319.212374	1389.621015	1462.411064	1517.560333
1B1G1	0	165.704492	165.544025	170.928103	169.970748	168.771633	169.32121	172.365843	172.933746	174.149861	176.078425	177.793529	178.646354	180.098952	180.29554	182.9388	186.278312	188.913683	192.508535	197.479295	201.892078	207.9696	216.195789	226.051061	235.877318	247.756512	261.413524	276.258508	292.995167	309.121297	326.646626	343.813962	361.959145	376.891587	393.19176	407.366308	421.756201	434.479793	445.511332	456.457081	466.281108	477.089349	485.453873	496.012304	502.535254	511.664941	521.836969	533.548787	538.028981
1B1G2	0	173.703304	159.825497	170.7118	170.616548	168.841019	174.20363	171.947092	173.738125	174.965018	175.159403	177.130557	178.420164	178.22874	180.229047	182.616998	184.88274	187.78493	190.932689	195.473133	199.998215	207.069599	213.358626	222.300815	232.652007	244.317013	258.374777	273.687863	290.355129	308.199437	326.855688	346.946316	366.841867	384.192118	402.437141	419.55446	436.856007	451.614899	463.488452	476.196457	488.213121	500.456029	510.010104	521.425749	529.22082	539.521243	549.368858	561.73352	566.566827
1B1G3	0	170.646514	171.12556	165.951088	177.880525	171.884533	167.618609	169.120325	171.868471	174.507373	173.820663	175.549995	178.588746	179.242385	180.285322	182.175287	184.202909	187.532393	191.221345	194.48668	199.69108	205.485321	212.104804	221.886897	230.84161	243.537792	256.11458	272.171457	289.313949	306.944821	327.512738	348.201014	370.189949	390.173695	409.200775	428.397945	446.78143	464.111686	477.947007	492.63889	505.01755	518.295026	528.582449	541.146075	549.266886	559.711246	570.166645	581.786375	587.854353
2B1G1	0	160.033878	165.893847	165.712486	158.198692	157.692096	163.418732	166.15971	168.45041	170.002986	169.650897	170.896704	174.016724	174.946251	175.875781	177.775347	179.442436	183.177737	186.352281	191.14003	196.480843	203.488217	209.810575	219.072578	229.200949	242.220738	256.964819	272.574457	291.812296	312.068965	333.876719	357.084757	382.64909	405.761425	431.380962	454.605562	479.747922	502.608644	521.5931	542.675499	560.80835	580.713438	594.267626	612.803844	624.616764	639.692443	654.206832	668.738555	680.354302
2B1G2	0	167.616095	165.731664	164.225639	162.0337	164.315988	164.182715	165.690562	166.060305	168.164418	169.97916	171.155124	173.681907	175.046429	175.046417	177.036989	179.755864	182.45377	185.194329	190.020786	194.267546	200.965757	207.442236	216.077739	226.426691	238.894698	252.609337	270.083467	289.385181	310.557282	333.700832	360.113745	387.909729	414.39034	442.400056	470.213976	499.117358	526.130355	549.814725	574.369399	595.398475	619.887245	636.740179	658.006896	671.885423	688.520966	706.66855	725.807	734.19948
2B1G3	0	159.426845	159.876403	167.589336	169.058577	165.541328	165.308169	170.163327	169.753183	170.578397	170.20198	171.629451	173.29474	174.230098	174.562878	177.309637	179.89001	182.151598	185.102135	189.27894	194.205006	200.082283	206.646326	215.023374	224.69947	237.909216	252.117348	268.309751	287.569766	309.037828	333.557705	359.909954	388.404022	416.598517	445.265235	475.674621	505.91024	533.9196	558.784774	585.285289	608.295323	633.064712	651.956561	674.921717	690.035318	708.31005	727.181813	745.536938	755.237961
3B1G1	0	220.426001	221.427048	228.174781	232.509449	241.548165	240.422713	243.169339	249.655769	248.406742	255.344781	254.574396	259.466503	260.583327	261.825526	262.370852	265.942832	269.19618	271.765638	275.492125	278.625575	283.527549	287.825459	293.399144	299.590138	308.222249	316.518238	327.036465	339.232503	352.672529	368.530258	387.148574	408.118317	428.640585	453.798707	479.312822	507.310966	534.632587	560.706491	587.967033	614.367698	641.737535	664.891257	689.972091	708.518824	729.63856	748.806267	771.45152	781.959413
3B1G2	0	220.571745	229.472993	228.053615	234.526962	238.064139	239.976037	245.467392	248.394619	251.665475	257.06497	257.085556	259.139603	261.525358	261.541805	264.48308	266.007872	270.080007	272.209181	274.885544	279.129946	283.214573	287.222203	293.29233	300.178435	307.152708	315.376153	325.129005	337.482017	350.739478	366.683541	384.962958	406.998699	428.604195	455.03629	482.333153	513.740383	543.613641	573.662939	605.204608	636.244135	667.152108	694.804369	724.514302	747.084113	771.28955	794.123469	818.3388	831.432932
3B1G3	0	225.636185	223.483295	225.559546	224.207886	236.578658	242.669825	247.278514	254.071147	253.362049	254.624974	257.053713	259.750512	260.983593	261.311741	264.942429	266.793406	269.492861	272.310263	275.203235	279.457	283.477355	287.599471	294.482252	298.302296	306.08658	314.66763	324.976318	336.255008	349.816268	365.668763	384.215611	405.343109	427.194644	454.307705	482.158866	512.972065	544.032557	575.005895	606.67071	638.977228	670.068018	698.459252	727.922413	751.375385	775.521499	798.503762	822.180429	835.251494
3B3GA2	1	229.592519	224.997027	227.381745	224.695146	223.743727	227.451089	228.484528	232.969891	234.987149	235.439908	235.878809	239.758757	240.195386	239.832794	242.895509	244.435144	246.174444	247.982909	251.388319	253.35167	258.659729	261.997719	267.364136	273.149688	279.817113	288.099165	297.997243	308.912619	321.083363	335.982852	353.069637	372.562364	393.310197	415.527431	441.966013	471.728927	503.21968	537.70317	573.039058	614.59714	656.09088	697.987775	744.161919	792.722249	837.290953	885.393212	930.540677	971.073208
3B3GA3	1	222.55254	219.639166	222.744276	231.2002	227.184851	224.674193	228.474602	231.646124	236.200734	237.305267	236.81629	239.269859	239.479732	239.093889	241.642005	243.795836	246.647316	248.225979	250.039097	253.269027	257.828725	261.891198	267.199873	273.03706	280.394602	288.297159	298.170542	309.192835	321.391698	335.779577	352.057015	371.37552	392.773818	414.577412	440.912553	469.840547	500.549553	532.370364	568.740037	608.978888	648.044727	689.218351	731.02355	778.693241	827.599243	871.314345	911.447147	952.932385
3B3GA4	1	223.222092	218.504564	223.427225	219.04932	220.486712	230.923284	237.549784	230.010194	234.372018	237.106502	237.675476	238.797921	240.393191	240.143055	242.497005	244.19205	245.469023	248.281331	250.512404	252.672012	257.863817	261.349717	266.552287	273.683756	279.694932	287.372354	297.715073	308.402841	321.530735	335.528997	351.930143	371.041422	391.731287	414.545945	439.531616	466.933241	498.253432	529.478333	565.303753	606.028194	642.877611	684.867742	727.829612	776.538192	815.729513	863.858238	906.895621	944.799701
2B3G2	0	220.034491	221.758672	220.469495	218.733264	222.398384	225.073799	225.750528	226.864267	227.093072	230.275129	231.454934	232.985291	233.913591	234.534895	235.770727	238.230731	240.241506	243.047137	245.529062	249.64569	253.72396	259.317571	265.698796	274.863264	282.799534	294.040414	307.165112	323.763285	343.146232	365.46949	391.472069	421.786141	452.631871	485.450305	520.1182	557.814489	593.953113	629.70182	662.882818	698.047528	726.95595	755.894147	781.183177	808.092164	830.839125	850.748486	868.893744	885.141584
2B3G3	0	218.595014	214.473275	221.498098	210.111172	219.124936	224.589395	227.731652	227.037693	228.502203	228.614556	230.685366	231.929159	234.154982	233.963799	234.936957	237.325872	239.941447	242.186281	244.796235	248.863786	253.309567	258.535082	264.808523	272.045731	281.308957	293.367181	307.7464	323.717003	342.398733	364.530992	390.037036	419.656853	450.354442	482.69203	517.744195	555.081736	590.545181	624.210144	657.763844	692.479762	721.203451	750.059906	774.793968	800.898786	823.496922	842.520044	862.197712	876.46969
2B3G4	0	214.333089	217.089538	211.402342	224.152223	218.641269	225.512686	224.726337	228.846016	230.281617	229.384337	229.782343	232.477031	234.496557	233.583994	235.999219	237.095869	240.357882	242.642031	245.093728	248.039118	253.492276	257.450263	264.294602	272.224944	280.931674	292.568438	306.366143	322.750904	341.496808	363.552667	389.10409	417.878202	450.235245	483.715157	519.623958	556.688094	592.987307	628.506573	663.713568	699.017939	728.266152	756.561	782.06068	810.098268	831.210147	850.744234	873.367917	889.524112
2B3GA2	1	224.475912	221.692019	230.349849	224.661004	222.429098	229.169893	230.092121	237.645332	236.687501	238.105362	239.275925	240.890526	242.851185	242.205891	244.544967	247.630451	248.239214	251.694017	253.978836	258.045912	261.723537	265.827202	272.378093	277.962107	286.013806	297.263551	309.110952	323.45789	341.029588	362.748924	389.141086	420.14943	456.347238	493.892111	540.605045	589.304786	641.465933	694.008075	749.24179	806.384107	857.560313	908.721683	954.488676	1002.563687	1038.017837	1068.938259	1108.993719	1130.831854
2B3GA3	1	215.712502	227.835399	224.581539	226.545361	230.725198	228.110874	234.851562	233.535237	235.599	238.043627	239.354453	241.561511	242.032611	242.565259	244.321821	246.094325	249.170267	251.020817	254.359484	257.362716	261.248008	265.266532	270.762586	278.335501	286.919574	296.676878	309.20659	323.71552	340.965246	362.762184	388.995708	420.843466	456.580294	494.358551	539.006326	587.739242	638.395914	691.409843	745.826978	800.502115	849.893739	899.282202	944.893341	991.898454	1026.505181	1058.465475	1091.603673	1118.059073
2B3GA4	1	221.623471	222.66272	231.965692	230.599116	229.893612	227.524215	228.994042	233.672081	234.601353	240.000839	240.15393	242.335497	242.303866	241.592644	243.657133	246.04487	248.432186	251.325775	253.857316	256.776638	261.007276	265.525849	271.182514	277.029177	285.385159	295.056687	308.211556	323.42537	341.399813	362.345427	388.697939	420.18793	455.036866	494.370616	538.376924	587.884494	638.039397	690.984474	744.277033	799.161468	848.868962	896.925144	938.632353	986.446853	1024.396592	1055.092027	1088.497566	1114.112581
3B3G2	0	225.796161	227.504261	229.951259	218.452599	229.918433	227.790045	226.464091	233.246717	233.384521	234.925684	236.882732	237.502692	238.558695	238.567628	240.542161	242.745456	245.615658	248.958505	250.357042	253.401879	258.537721	262.525214	267.772626	274.81269	280.828741	290.035881	299.563603	310.565587	322.512675	336.515625	351.611491	370.001452	386.571326	405.876138	427.872893	451.659937	475.349119	499.869902	526.388734	556.61943	582.797586	612.978425	638.712171	670.451215	698.865184	727.156633	757.817983	777.793476
3B3G3	0	239.551511	221.329028	218.076668	228.45493	221.823622	224.335426	229.976684	232.540482	232.51887	233.530874	237.164105	237.792979	238.181753	238.453607	240.564294	243.204387	244.644064	248.043765	250.220498	253.692765	257.623138	262.383312	267.405963	273.851796	280.208691	289.231455	299.313779	309.86566	321.818459	335.862865	350.391583	368.697155	386.704978	406.051276	428.404319	451.705484	476.070576	502.684439	529.713524	559.854652	587.499151	617.383377	646.980777	680.086221	708.342916	736.142313	767.868357	794.159568
3B3G4	0	224.07641	218.735116	227.497469	222.730581	220.245639	227.913681	227.84842	232.66538	233.208382	232.806381	233.357454	239.639284	238.118292	238.488166	240.933139	242.873725	245.217424	247.469785	249.923688	252.625477	256.543426	261.812327	265.917468	273.192229	280.399751	288.316431	299.070756	309.815415	321.880203	335.263336	350.638871	367.914793	387.006375	406.641813	429.088722	452.327382	477.635173	503.201593	531.912603	560.782945	589.623791	620.789363	652.753122	688.099976	716.842229	744.226318	772.659605	803.763072
BB3G2	0	209.346095	196.32909	199.955468	206.559192	209.791015	204.704149	211.423364	211.86904	212.956405	213.788174	213.953056	216.112094	216.942653	216.106169	218.426305	220.94009	222.597558	225.11143	228.341304	231.5962	237.363257	242.305376	248.59418	257.901956	265.96151	277.123349	289.692367	305.530668	321.873477	340.467098	361.487065	385.02757	407.442435	430.826575	453.911873	478.318136	501.654282	522.787689	542.436193	564.786748	583.730956	602.517059	618.832025	640.71863	654.084279	669.589266	685.806075	698.538129
BB3G3	0	211.189604	198.84518	194.762147	211.962182	205.746324	207.032965	207.196579	211.367573	212.707457	213.388803	213.700888	215.762166	215.576714	217.051954	218.25234	220.469117	222.648593	225.290423	228.465961	231.2752	236.314899	241.200693	247.390247	255.081496	264.608612	275.636461	289.395626	303.448912	321.231288	340.035107	361.098352	384.536448	408.180619	433.419713	457.772365	483.856298	509.334201	532.604246	554.905207	577.140978	597.668946	618.516631	635.353503	656.33922	673.120634	690.840651	706.678447	721.060048
BB3G4	0	207.015264	196.763512	205.99118	194.240114	208.847733	208.85538	205.400933	210.933874	211.203006	211.586751	213.650382	215.031662	216.106339	216.503376	218.13196	220.723565	222.519912	225.154713	227.388889	230.74476	236.677109	241.391329	246.675053	255.885162	263.888285	274.814294	287.745301	302.247652	319.165018	338.843562	359.891158	383.738009	409.117805	433.665511	459.421189	486.260354	512.153555	536.516844	559.492388	583.261881	605.55178	624.441212	645.875369	666.614888	683.966223	701.240711	717.868236	733.051076
BB3GA3	1	211.591883	208.001798	190.771813	206.248389	205.211032	205.517234	204.544633	209.591726	210.417339	209.503394	212.643268	213.66226	213.748769	214.460954	214.654041	217.142382	218.981526	221.549367	223.911706	227.006457	230.009345	234.245058	238.664173	244.452212	251.990167	260.459355	270.886597	284.323547	300.043701	318.879324	342.555268	368.861934	400.005697	434.635097	474.019942	516.529478	563.175513	610.545878	659.117587	709.967733	757.581582	805.267146	847.486649	891.085971	928.761348	963.37588	996.633957	1025.92574
BB3GA4	1	201.526999	191.788147	201.986574	197.436882	199.260511	205.476468	205.235689	207.808007	210.451876	209.956216	210.810233	212.39969	214.183985	214.509386	215.775496	216.741402	219.407628	222.079227	224.196929	225.892348	230.543282	234.139701	239.038781	244.845962	251.759926	260.497394	271.9346	284.473507	300.376494	318.99108	343.028829	369.003922	400.682375	435.933042	473.608053	517.122852	561.85507	607.653345	655.195586	704.56152	747.990882	793.028521	832.403243	878.198821	915.013922	946.862843	978.319639	1007.610263
BB3GA5	1	195.857675	203.25063	204.461371	198.682995	200.510995	203.982201	206.607772	207.91755	208.317201	210.99696	210.978477	213.752659	213.466652	213.691303	215.365498	216.799958	218.916877	221.54519	222.584167	226.443943	229.60795	234.724763	239.198255	244.514584	251.991845	261.143772	271.855611	285.514292	300.75487	319.696441	343.398728	370.492933	401.1977	435.395519	474.456992	516.730287	561.253654	607.2803	655.383885	703.614485	748.454988	790.831527	830.157426	874.573564	913.752345	942.419097	976.427975	1004.393157
[truncated: 104 more columns]
